# Supplementary material for: Knockout of AMD-associated gene POLDIP2 reduces mitochondrial superoxide in human retinal pigment epithelial cells
Source: Aging (Albany NY). 2023 Feb 16;15(6):1713–33. doi: 10.18632/aging.204522 (PMC10085620; doi:10.18632/aging.204522)
Supplement: Supplementary Data 1 [file aging-15-204522-s003.xls]

## Sheet: upregulated genes
Supplementary Data 1. List of all DE genes in POLDIP2 KO compared to WT ARPE19 cells.
Gene ID	baseMean	log2FoldChange	lfcSE	stat	pvalue	padj	genelabels
ENSG00000112096	15228.7	1.89361	0.144404	13.1206	2.51103e-39	4.04527e-35	SOD2
ENSG00000125538	175.875	2.06749	0.200826	10.9591	6.01251e-28	3.22872e-24	IL1B
ENSG00000108691	4611.96	1.69937	0.164929	10.3189	5.79087e-25	2.33227e-21	CCL2
ENSG00000123453	145.956	2.00513	0.199671	10.1046	5.27366e-24	1.69917e-20	SARDH
ENSG00000162645	167.161	1.66439	0.200529	8.92691	4.38085e-19	7.84172e-16	GBP2
ENSG00000144802	620.452	1.29408	0.148084	8.72874	2.57534e-18	3.77171e-15	NFKBIZ
ENSG00000157657	756.392	1.0822	0.123789	8.73506	2.43532e-18	3.77171e-15	ZNF618
ENSG00000049249	331.402	1.6382	0.189448	8.67478	4.14344e-18	5.56257e-15	TNFRSF9
ENSG00000118503	529.55	1.57178	0.184016	8.56226	1.10678e-17	1.37156e-14	TNFAIP3
ENSG00000108387	282.123	1.49596	0.183209	8.15849	3.39237e-16	3.90365e-13	SEPT4
ENSG00000125730	3984.65	1.40543	0.188955	7.48348	7.23812e-14	6.85918e-11	C3
ENSG00000198796	1622.2	1.20089	0.168403	7.13547	9.64594e-13	7.7698e-10	ALPK2
ENSG00000163661	275.753	1.34121	0.201192	6.90604	4.98371e-12	3.82322e-09	PTX3
ENSG00000196639	312.352	1.13712	0.168432	6.74196	1.56265e-11	1.04893e-08	HRH1
ENSG00000176490	307.13	1.19908	0.181479	6.6061	3.94566e-11	2.44479e-08	DIRAS1
ENSG00000186854	302.351	1.06043	0.165769	6.38835	1.67686e-10	9.64794e-08	TRABD2A
ENSG00000137752	155.616	1.22155	0.194858	6.27911	3.40506e-10	1.66229e-07	CASP1
ENSG00000112769	3843.6	1.05262	0.17206	6.12345	9.15687e-10	3.85612e-07	LAMA4
ENSG00000173918	99.9453	1.08951	0.195095	6.04502	1.4939e-09	5.86994e-07	C1QTNF1
ENSG00000118849	234.28	1.15196	0.1927	5.99414	2.04563e-09	7.4898e-07	RARRES1
ENSG00000158023	203.126	1.092	0.182436	5.97969	2.23558e-09	7.89593e-07	WDR66
ENSG00000205629	993.009	0.951695	0.159307	5.97333	2.3246e-09	7.96793e-07	LCMT1
ENSG00000105281	1787.01	1.06922	0.17963	5.96122	2.5036e-09	8.40272e-07	SLC1A5
ENSG00000169851	1373.67	1.09813	0.200277	5.56657	2.59799e-08	7.8969e-06	PCDH7
ENSG00000163739	33.7103	0.80878	0.173128	5.54765	2.89537e-08	8.63787e-06	CXCL1
ENSG00000205403	58.1117	1.06511	0.198631	5.53203	3.16544e-08	9.1063e-06	CFI
ENSG00000188015	298.293	0.916256	0.16778	5.45631	4.86142e-08	1.3503e-05	S100A3
ENSG00000163131	17.2602	0.713381	0.162245	5.42917	5.66162e-08	1.54591e-05	CTSS
ENSG00000151468	58.4202	1.08146	0.201151	5.42553	5.77842e-08	1.55151e-05	CCDC3
ENSG00000090339	1492.82	1.03374	0.192934	5.38242	7.34906e-08	1.91085e-05	ICAM1
ENSG00000161638	14887.1	0.743277	0.138347	5.3729	7.74807e-08	1.95492e-05	ITGA5
ENSG00000141655	371.67	0.999769	0.187485	5.33898	9.34697e-08	2.31661e-05	TNFRSF11A
ENSG00000081041	73.5808	0.90168	0.190797	5.11039	3.21495e-07	7.29477e-05	CXCL2
ENSG00000058091	1063.03	0.74456	0.146075	5.09635	3.46272e-07	7.6417e-05	CDK14
ENSG00000164983	1870.45	0.642943	0.126794	5.07037	3.97036e-07	8.4193e-05	TMEM65
ENSG00000229353	64.6141	1.01061	0.201186	5.0703	3.97186e-07	8.4193e-05	TNXB
ENSG00000163874	708.746	0.841866	0.167951	5.01329	5.35073e-07	0.000109114	ZC3H12A
ENSG00000285330	77.6642	0.975275	0.200511	4.95554	7.21315e-07	0.000143461	AC126283.2
ENSG00000182326	1481.47	0.780135	0.1636	4.76934	1.84833e-06	0.00034624	C1S
ENSG00000187634	68.8234	0.866634	0.194129	4.68961	2.73732e-06	0.000484597	SAMD11
ENSG00000185215	917.991	0.586859	0.1621	4.65854	3.18462e-06	0.000551658	TNFAIP2
ENSG00000283537	20.5679	0.599306	0.15645	4.61008	4.02513e-06	0.000689839	AC073264.3
ENSG00000150630	1013.8	0.639347	0.140657	4.54468	5.50199e-06	0.000907549	VEGFC
ENSG00000164379	269.2	0.894818	0.198685	4.52895	5.92785e-06	0.000947797	FOXQ1
ENSG00000011028	1897.72	0.669081	0.148172	4.51556	6.31496e-06	0.000997392	MRC2
ENSG00000174837	20.9852	0.669243	0.169058	4.49617	6.91889e-06	0.00105154	ADGRE1
ENSG00000125618	453.985	0.863641	0.194919	4.44502	8.78828e-06	0.0012641	PAX8
ENSG00000087245	1252.49	0.862912	0.201156	4.34895	1.3679e-05	0.00177717	MMP2
ENSG00000170962	295.102	0.73616	0.169479	4.34197	1.41211e-05	0.00180548	PDGFD
ENSG00000131370	666.355	0.75037	0.173231	4.33233	1.4754e-05	0.00185479	SH3BP5
ENSG00000104133	1432.66	0.689874	0.160433	4.30063	1.70316e-05	0.00207863	SPG11
ENSG00000148680	23.6635	0.712816	0.179185	4.29382	1.75627e-05	0.00212733	HTR7
ENSG00000144218	666.614	0.792858	0.186902	4.24737	2.16291e-05	0.00254667	AFF3
ENSG00000138642	386.236	0.728926	0.172387	4.22838	2.35378e-05	0.00270919	HERC6
ENSG00000071073	412.812	0.671416	0.160394	4.18493	2.8525e-05	0.00316922	MGAT4A
ENSG00000169242	273.064	0.801645	0.192154	4.17901	2.92783e-05	0.00323064	EFNA1
ENSG00000121797	22.7909	0.623781	0.169484	4.14374	3.41681e-05	0.00369428	CCRL2
ENSG00000196739	618.577	0.774136	0.187589	4.13161	3.60236e-05	0.00386893	COL27A1
ENSG00000196954	103.017	0.816622	0.20067	4.09227	4.27179e-05	0.00443991	CASP4
ENSG00000079150	295.172	0.630987	0.154714	4.07608	4.58017e-05	0.00462178	FKBP7
ENSG00000132688	292.183	0.722068	0.177061	4.07676	4.5667e-05	0.00462178	NES
ENSG00000185432	117.227	0.807341	0.19929	4.06365	4.83122e-05	0.00483422	METTL7A
ENSG00000125744	631.204	0.747889	0.185173	4.0431	5.27498e-05	0.00524567	RTN2
ENSG00000004660	139.937	0.786841	0.196714	4.00562	6.18558e-05	0.0060762	CAMKK1
ENSG00000062282	134.914	0.719144	0.180237	3.98527	6.74034e-05	0.00642526	DGAT2
ENSG00000169884	51.8484	0.782717	0.201191	3.90569	9.39557e-05	0.00840903	WNT10B
ENSG00000100906	1572.52	0.621446	0.159649	3.89284	9.90769e-05	0.00876994	NFKBIA
ENSG00000140465	217.099	0.764919	0.198839	3.86382	0.000111626	0.00972049	CYP1A1
ENSG00000082482	208.697	0.755445	0.197495	3.83466	0.000125739	0.0106055	KCNK2
ENSG00000184557	308.734	0.72902	0.192073	3.80027	0.000144541	0.0118201	SOCS3
ENSG00000160223	378.049	0.710596	0.194708	3.65767	0.000254517	0.0192501	ICOSLG
ENSG00000109472	1484.2	0.600284	0.164281	3.65439	0.000257791	0.0194066	CPE
ENSG00000111077	477.484	0.707679	0.194419	3.64798	0.00026431	0.0195729	TNS2
ENSG00000157064	197.383	0.727021	0.201132	3.64255	0.000269952	0.0198581	NMNAT2
ENSG00000243649	132.706	0.717029	0.200385	3.62863	0.000284932	0.0206768	CFB
ENSG00000184363	68.4394	0.66536	0.192093	3.58604	0.000335737	0.023827	PKP3
ENSG00000102048	70.7977	0.70772	0.197404	3.58303	0.000339635	0.0238931	ASB9
ENSG00000157557	739.122	0.644711	0.180188	3.57984	0.000343798	0.0240808	ETS2
ENSG00000128656	176.021	0.707208	0.200948	3.56	0.000370854	0.0257065	CHN1
ENSG00000135253	294.715	0.630955	0.178639	3.53233	0.000411908	0.0276493	KCP
ENSG00000135919	1054.63	0.607793	0.171884	3.53665	0.000405242	0.0276493	SERPINE2
ENSG00000081803	313.624	0.59362	0.168627	3.51946	0.000432419	0.0285503	CADPS2
ENSG00000023445	446.557	0.663618	0.188934	3.51595	0.000438179	0.0286954	BIRC3
ENSG00000144227	65.3901	0.693038	0.197	3.51299	0.000443092	0.0288997	NXPH2
ENSG00000000971	781.796	0.615985	0.175936	3.5019	0.000461959	0.0298882	CFH
ENSG00000115919	145.515	0.580815	0.180144	3.46549	0.000529265	0.0334255	KYNU
ENSG00000249437	59.3405	0.588551	0.182404	3.41985	0.000626548	0.0378041	NAIP
ENSG00000168477	186.102	0.671691	0.197752	3.40496	0.000661748	0.0394843	TNXB
ENSG00000244242	54.5017	0.677178	0.201187	3.37595	0.000735604	0.0429369	IFITM10
ENSG00000196368	199.615	0.664507	0.197402	3.37285	0.000743938	0.0432666	NUDT11
ENSG00000221869	91.4332	0.664402	0.199126	3.34338	0.000827651	0.0466205	CEBPD
ENSG00000008277	428.885	0.644977	0.193418	3.33961	0.000838967	0.0469297	ADAM22
ENSG00000234078	931.188	0.590918	0.177417	3.33194	0.000862431	0.0477449	DDR1

## Sheet: downregulated genes
Supplementary Data 1. List of all DE genes in POLDIP2 KO compared to WT ARPE19 cells.
Gene ID	baseMean	log2FoldChange	lfcSE	stat	pvalue	padj	genelabels
ENSG00000004142	2832.88	-1.72428	0.132874	-12.9715	1.77601e-38	1.43058e-34	POLDIP2
ENSG00000132549	1984.65	-1.55226	0.167803	-9.26061	2.03276e-20	4.67826e-17	VPS13B
ENSG00000183018	10349.9	-1.44835	0.156288	-9.27365	1.79881e-20	4.67826e-17	SPNS2
ENSG00000103067	116.629	-1.75629	0.188698	-9.16627	4.89664e-20	9.8606e-17	ESRP2
ENSG00000132840	353.01	-1.46523	0.180207	-8.13259	4.20227e-16	4.51324e-13	BHMT2
ENSG00000182636	82.5617	-1.68941	0.196808	-8.07621	6.68129e-16	6.72723e-13	NDN
ENSG00000092847	589.312	-1.07002	0.143462	-7.45121	9.24846e-14	8.27738e-11	AGO1
ENSG00000121316	135.55	-1.36084	0.187448	-7.22387	5.05282e-13	4.28426e-10	PLBD1
ENSG00000256683	228.037	-1.17442	0.170245	-6.88309	5.85673e-12	4.28872e-09	ZNF350
ENSG00000105655	801.528	-1.19023	0.173232	-6.87568	6.16927e-12	4.32117e-09	ISYNA1
ENSG00000277614	50.7094	-0.917107	0.173212	-6.69262	2.19208e-11	1.41258e-08	SCG5
ENSG00000146038	348.559	-1.24391	0.189331	-6.58626	4.51033e-11	2.69116e-08	DCDC2
ENSG00000198692	33.38	-1.178	0.191784	-6.35998	2.01777e-10	1.12091e-07	EIF1AY
ENSG00000197928	111.239	-1.24519	0.201157	-6.35294	2.11243e-10	1.13437e-07	ZNF677
ENSG00000184867	549.049	-1.21108	0.191941	-6.33933	2.3077e-10	1.19926e-07	ARMCX2
ENSG00000067048	47.6395	-0.990788	0.178914	-6.30756	2.83474e-10	1.42712e-07	DDX3Y
ENSG00000184368	564.351	-0.96094	0.15338	-6.26078	3.83049e-10	1.81498e-07	MAP7D2
ENSG00000067064	3927.2	-0.921106	0.147961	-6.22603	4.7841e-10	2.19217e-07	IDI1
ENSG00000162738	272.3	-1.22248	0.198234	-6.22232	4.8987e-10	2.19217e-07	VANGL2
ENSG00000159212	3165.3	-1.01953	0.166211	-6.13705	8.40685e-10	3.66039e-07	CLIC6
ENSG00000113161	2575.06	-0.864348	0.141223	-6.12038	9.33511e-10	3.85612e-07	HMGCR
ENSG00000198521	312.689	-1.17287	0.192591	-6.1144	9.69214e-10	3.90351e-07	ZNF43
ENSG00000123243	267.185	-1.18656	0.199528	-6.02177	1.72518e-09	6.61729e-07	ITIH5
ENSG00000012817	25.7706	-0.891676	0.172838	-6.01484	1.80061e-09	6.74602e-07	KDM5D
ENSG00000166206	35.0617	-1.03283	0.18772	-5.97831	2.25458e-09	7.89593e-07	GABRB3
ENSG00000113805	47.4138	-0.925223	0.174394	-5.93454	2.94669e-09	9.68798e-07	CNTN3
ENSG00000128606	54.4324	-1.05048	0.194496	-5.71789	1.07855e-08	3.47508e-06	LRRC17
ENSG00000229292	90.2004	-0.704298	0.167081	-5.6107	2.01505e-08	6.3652e-06	RFPL4AL1
ENSG00000117477	27.2921	-0.908752	0.178851	-5.57213	2.51639e-08	7.79596e-06	CCDC181
ENSG00000144712	226.203	-0.978046	0.176213	-5.54359	2.96337e-08	8.67999e-06	CAND2
ENSG00000186480	3515.36	-0.95557	0.17351	-5.5121	3.54576e-08	1.00214e-05	INSIG1
ENSG00000285502	27.9621	0.459149	0.138922	5.3823	7.354e-08	1.91085e-05	AL136295.15
ENSG00000135480	3247.22	-0.981622	0.183045	-5.37248	7.76628e-08	1.95492e-05	KRT7
ENSG00000196172	238.462	-0.862811	0.161924	-5.32031	1.03593e-07	2.52861e-05	ZNF681
ENSG00000001630	5113.9	-0.818476	0.154301	-5.30534	1.12463e-07	2.70415e-05	CYP51A1
ENSG00000205189	441.061	-0.980398	0.185059	-5.30155	1.14824e-07	2.72032e-05	ZBTB10
ENSG00000159164	857.802	-0.697755	0.133381	-5.23001	1.69505e-07	3.95758e-05	SV2A
ENSG00000163395	390.895	0.471209	0.144218	5.16226	2.43991e-07	5.61529e-05	IGFN1
ENSG00000147231	32.4478	-0.845115	0.182158	-5.09722	3.44669e-07	7.6417e-05	CXorf57
ENSG00000182983	60.2332	-0.543559	0.152101	-5.08357	3.70409e-07	8.06391e-05	ZNF662
ENSG00000284967	4394.79	-0.792729	0.15718	-5.04455	4.54581e-07	9.51077e-05	AC270285.2
ENSG00000146966	1779.6	-0.916997	0.182274	-5.03761	4.71381e-07	9.73583e-05	DENND2A
ENSG00000170881	1687.65	0.562788	0.112476	5.00317	5.63946e-07	0.000113565	RNF139
ENSG00000205978	71.3831	-0.961691	0.200088	-4.9205	8.6325e-07	0.000169597	NYNRIN
ENSG00000120437	3585.7	-0.743256	0.151647	-4.90184	9.49434e-07	0.000182088	ACAT2
ENSG00000131002	12.8825	-0.54592	0.148653	-4.90317	9.43033e-07	0.000182088	TXLNGY
ENSG00000171004	13.1379	-0.513832	0.145411	-4.85615	1.19688e-06	0.000226844	HS6ST2
ENSG00000165548	42.9052	-0.809795	0.184881	-4.76185	1.91827e-06	0.000355211	TMEM63C
ENSG00000197128	200.29	-0.941411	0.199475	-4.75549	1.97962e-06	0.000362405	ZNF772
ENSG00000110921	797.269	-0.744353	0.157625	-4.72251	2.32953e-06	0.000421671	MVK
ENSG00000235307	13.6565	-0.439436	0.137159	-4.71862	2.37448e-06	0.000425032	BRD2
ENSG00000171724	62.9485	-0.728651	0.177505	-4.67675	2.91464e-06	0.000510379	VAT1L
ENSG00000139998	874.72	-0.747783	0.163189	-4.58241	4.59639e-06	0.000779452	RAB15
ENSG00000151692	26.3274	-0.758751	0.180423	-4.57944	4.66216e-06	0.000782369	RNF144A
ENSG00000185442	322.799	-0.720936	0.158551	-4.54396	5.52078e-06	0.000907549	FAM174B
ENSG00000146950	101.75	-0.904804	0.200722	-4.53379	5.79354e-06	0.000942767	SHROOM2
ENSG00000112972	4899.06	-0.882074	0.195706	-4.52844	5.94212e-06	0.000947797	HMGCS1
ENSG00000101265	373.526	-0.829426	0.18417	-4.50549	6.62195e-06	0.00103572	RASSF2
ENSG00000235750	74.4881	-0.854984	0.196849	-4.50108	6.76076e-06	0.00104727	KIAA0040
ENSG00000171466	1050.23	-0.564168	0.125383	-4.49879	6.83418e-06	0.00104856	ZNF562
ENSG00000103064	2420.53	-0.691395	0.153885	-4.49323	7.01497e-06	0.00105618	SLC7A6
ENSG00000131844	561.976	-0.867752	0.199661	-4.47231	7.7379e-06	0.00115424	MCCC2
ENSG00000145335	11.6116	-0.39547	0.131836	-4.46833	7.88329e-06	0.00116514	SNCA
ENSG00000091136	6278.81	0.509143	0.114392	4.4508	8.55491e-06	0.00125291	LAMB1
ENSG00000052802	6011.71	-0.774381	0.174282	-4.44614	8.74251e-06	0.0012641	MSMO1
ENSG00000163879	225.188	-0.836125	0.188876	-4.42877	9.47707e-06	0.00135111	DNALI1
ENSG00000223638	133.366	-0.584462	0.1639	-4.40621	1.05194e-05	0.00148656	RFPL4A
ENSG00000095383	4214.07	0.450374	0.102373	4.39927	1.08615e-05	0.00150429	TBC1D2
ENSG00000256618	6171.7	-0.707213	0.160835	-4.39801	1.0925e-05	0.00150429	MTRNR2L1
ENSG00000276497	87.954	-0.824516	0.195045	-4.40016	1.08173e-05	0.00150429	APBA1
ENSG00000148600	17.1954	-0.484591	0.143197	-4.39556	1.10487e-05	0.00150842	CDHR1
ENSG00000258466	47.0853	0.436341	0.141553	4.3885	1.14134e-05	0.00154512	AL049779.1
ENSG00000101670	893.3	-0.835284	0.191138	-4.38066	1.18323e-05	0.00158849	LIPG
ENSG00000172893	3602.42	-0.725402	0.166663	-4.35395	1.33706e-05	0.00176558	DHCR7
ENSG00000175274	1169.18	-0.84205	0.193964	-4.35547	1.32779e-05	0.00176558	TP53I11
ENSG00000196502	389.491	-0.855007	0.197346	-4.3508	1.3564e-05	0.00177656	SULT1A1
ENSG00000136869	661.466	0.575217	0.132377	4.34426	1.39747e-05	0.00180106	TLR4
ENSG00000105810	10488.8	-0.540194	0.124731	-4.33087	1.48521e-05	0.00185479	CDK6
ENSG00000160752	7003.44	-0.642117	0.148268	-4.33117	1.48319e-05	0.00185479	FDPS
ENSG00000084453	80.6114	-0.694675	0.179512	-4.32061	1.55598e-05	0.00192822	SLCO1A2
ENSG00000105767	5605.86	0.574097	0.13325	4.30846	1.64394e-05	0.00202167	CADM4
ENSG00000136010	11.3262	0.335175	0.123406	4.25737	2.06847e-05	0.00247227	ALDH1L2
ENSG00000225967	628.424	0.55449	0.130218	4.25702	2.07173e-05	0.00247227	TAP2
ENSG00000180613	115.146	-0.78684	0.193907	-4.24709	2.1657e-05	0.00254667	GSX2
ENSG00000140284	859.439	-0.574249	0.135568	-4.23511	2.2844e-05	0.00266679	SLC27A2
ENSG00000274958	1321.94	-0.683212	0.161589	-4.22833	2.35435e-05	0.00270919	ITPK1
ENSG00000112796	105.288	-0.786172	0.194456	-4.22664	2.37205e-05	0.00271019	ENPP5
ENSG00000256229	201.629	-0.726165	0.172066	-4.21579	2.48905e-05	0.00282384	ZNF486
ENSG00000198597	107.643	-0.840584	0.201189	-4.21169	2.53472e-05	0.00285555	ZNF536
ENSG00000121898	75.0744	-0.814295	0.198449	-4.20505	2.61019e-05	0.00292015	CPXM2
ENSG00000145416	460.203	-0.696865	0.167388	-4.16298	3.14117e-05	0.00344246	MARCH1
ENSG00000114698	1090.11	0.514307	0.123877	4.15135	3.30517e-05	0.00359773	PLSCR4
ENSG00000177932	22.9706	-0.481838	0.148544	-4.11849	3.81355e-05	0.00406863	ZNF354C
ENSG00000081853	128.871	-0.727634	0.188874	-4.11389	3.89039e-05	0.0041233	PCDHGA2
ENSG00000282017	2885.45	-0.70195	0.171039	-4.10552	4.03403e-05	0.0042476	MTRNR2L6
ENSG00000223547	42.5495	-0.789688	0.197371	-4.09597	4.20404e-05	0.00439786	ZNF844
ENSG00000168306	98.4766	-0.666826	0.180174	-4.08998	4.31411e-05	0.00445514	ACOX2
ENSG00000241484	118.78	-0.814959	0.200781	-4.08826	4.34616e-05	0.00445965	ARHGAP8
ENSG00000162366	53.5928	0.538333	0.160069	4.07557	4.59022e-05	0.00462178	PDZK1IP1
ENSG00000187601	212.163	-0.781616	0.194471	-4.02437	5.71273e-05	0.00564614	MAGEH1
ENSG00000169129	64.1263	-0.705411	0.187148	-4.00052	6.32024e-05	0.00617085	AFAP1L2
ENSG00000233864	8.58394	-0.320781	0.121443	-3.99675	6.42185e-05	0.00623229	TTTY15
ENSG00000167757	780.314	-0.656557	0.164377	-3.99467	6.47837e-05	0.00624949	KLK11
ENSG00000170381	545.988	-0.733165	0.183802	-3.99191	6.55428e-05	0.00628509	SEMA3E
ENSG00000189143	74.2927	-0.789512	0.198437	-3.97708	6.97681e-05	0.00661155	CLDN4
ENSG00000114378	106.504	-0.792345	0.20093	-3.9715	7.14214e-05	0.00672865	HYAL1
ENSG00000185813	1471.83	-0.568923	0.14334	-3.96904	7.21633e-05	0.00675902	PCYT2
ENSG00000198786	134945	0.380617	0.0966113	3.93968	8.1592e-05	0.00759796	MT-ND5
ENSG00000175793	155.26	-0.779313	0.200717	-3.9359	8.28845e-05	0.00767396	SFN
ENSG00000008283	969.135	0.492199	0.125272	3.92862	8.54343e-05	0.00782015	CYB561
ENSG00000188338	27.005	-0.719675	0.1895	-3.92871	8.54035e-05	0.00782015	SLC38A3
ENSG00000047365	2632.49	-0.441127	0.112683	-3.91462	9.05483e-05	0.00819513	ARAP2
ENSG00000182557	79.0056	-0.783997	0.2009	-3.91553	9.0205e-05	0.00819513	SPNS3
ENSG00000132321	18.6869	-0.445335	0.144857	-3.91305	9.11376e-05	0.00820239	IQCA1
ENSG00000103647	554.695	-0.770046	0.198422	-3.8972	9.73127e-05	0.00866137	CORO2B
ENSG00000105737	1549.48	-0.443665	0.11445	-3.87636	0.000106032	0.00928356	GRIK5
ENSG00000130208	152.281	-0.773158	0.201132	-3.87723	0.000105653	0.00928356	APOC1
ENSG00000134438	12.2432	-0.370761	0.129958	-3.85134	0.000117472	0.0101746	RAX
ENSG00000172164	894.485	0.550005	0.143009	3.84542	0.000120345	0.010258	SNTB1
ENSG00000179403	7.71168	-0.301569	0.118455	-3.84742	0.00011937	0.010258	VWA1
ENSG00000196776	2695.34	0.393126	0.102228	3.8455	0.000120307	0.010258	CD47
ENSG00000164400	60.0392	0.565133	0.168232	3.84094	0.000122565	0.0103923	CSF2
ENSG00000151474	6183.7	-0.361444	0.0943965	-3.82897	0.000128681	0.0107412	FRMD4A
ENSG00000179314	332.231	-0.639906	0.167057	-3.83013	0.000128077	0.0107412	WSCD1
ENSG00000112144	106.241	-0.741031	0.198372	-3.81239	0.000137632	0.0114291	ICK
ENSG00000116157	6.92907	-0.312965	0.120371	-3.80802	0.000140084	0.0115731	GPX7
ENSG00000171827	97.7563	-0.754916	0.199158	-3.80389	0.000142442	0.0117078	ZNF570
ENSG00000166347	1064.62	0.449623	0.118598	3.79093	0.000150087	0.0122116	CYB5A
ENSG00000166396	994.898	-0.742173	0.196556	-3.78919	0.000151141	0.0122356	SERPINB7
ENSG00000169429	3704.78	0.553809	0.169002	3.75767	0.000171503	0.0138146	CXCL8
ENSG00000179023	274.567	-0.700962	0.187296	-3.74322	0.000181679	0.0145615	KLHDC7A
ENSG00000231205	59.5387	-0.736274	0.199313	-3.74105	0.000183256	0.0146151	ZNF826P
ENSG00000185090	1141.25	0.524188	0.14016	3.73967	0.000184265	0.0146232	MANEAL
ENSG00000156395	167.279	-0.74201	0.200987	-3.73716	0.000186107	0.014697	SORCS3
ENSG00000162444	231.274	-0.679019	0.182527	-3.71781	0.000200954	0.0157921	RBP7
ENSG00000102409	1463.18	-0.613132	0.165014	-3.71617	0.000202265	0.0158179	BEX4
ENSG00000139174	426.625	-0.687509	0.185538	-3.70707	0.00020967	0.0163178	PRICKLE1
ENSG00000088367	3906.3	0.499306	0.135239	3.69201	0.000222485	0.0172319	EPB41L1
ENSG00000132196	582.834	-0.607346	0.164645	-3.6893	0.000224875	0.0173337	HSD17B7
ENSG00000106682	4762.82	0.52301	0.142146	3.67947	0.000233716	0.0178919	EIF4H
ENSG00000114631	1898.96	0.575855	0.156542	3.6788	0.000234338	0.0178919	PODXL2
ENSG00000205592	23.7723	0.365732	0.133968	3.67719	0.000235816	0.0179198	MUC19
ENSG00000136986	2806.95	0.405596	0.11106	3.65197	0.000260233	0.0194704	DERL1
ENSG00000158286	493.959	-0.658347	0.180375	-3.65116	0.000261055	0.0194704	RNF207
ENSG00000165716	114.315	-0.728858	0.200933	-3.64745	0.00026486	0.0195729	FAM69B
ENSG00000157985	2625.78	-0.525029	0.144332	-3.63769	0.000275096	0.0201446	AGAP1
ENSG00000133134	424.57	-0.653874	0.180193	-3.62925	0.000284251	0.0206768	BEX2
ENSG00000176293	13.7277	-0.509314	0.158842	-3.61105	0.000304959	0.0220309	ZNF135
ENSG00000141576	755.924	-0.716951	0.201175	-3.59673	0.000322245	0.0231757	RNF157
ENSG00000159618	13.1474	0.544509	0.164748	3.59154	0.000328731	0.023433	ADGRG5
ENSG00000273686	4533.69	0.442951	0.123327	3.59166	0.000328576	0.023433	B2M
ENSG00000138496	1218.41	0.51634	0.144086	3.58342	0.000339127	0.0238931	PARP9
ENSG00000130702	3861.59	-0.66903	0.187395	-3.57433	0.000351124	0.0244875	LAMA5
ENSG00000198959	4430.4	-0.692368	0.195032	-3.55934	0.000371794	0.0257065	TGM2
ENSG00000164961	1893.36	0.430363	0.121263	3.54884	0.000386925	0.0266383	WASHC5
ENSG00000117226	1230.58	0.439309	0.124268	3.53493	0.000407881	0.0276493	GBP3
ENSG00000117479	793.482	-0.440727	0.124665	-3.53478	0.000408113	0.0276493	SLC19A2
ENSG00000167508	1231.89	-0.702089	0.199741	-3.53431	0.00040884	0.0276493	MVD
ENSG00000197077	6212.16	-0.481844	0.136403	-3.53252	0.000411615	0.0276493	KIAA1671
ENSG00000198478	205.715	-0.667086	0.18907	-3.52871	0.000417589	0.0279144	SH3BGRL2
ENSG00000221963	1295.58	0.413084	0.117101	3.5274	0.000419656	0.0279366	APOL6
ENSG00000173156	855.042	-0.552764	0.157023	-3.52005	0.000431465	0.0285503	RHOD
ENSG00000196437	128.599	-0.700532	0.200114	-3.51767	0.000435361	0.0286272	ZNF569
ENSG00000168003	1814.87	-0.616902	0.17604	-3.50556	0.00045565	0.0295988	SLC3A2
ENSG00000167107	608.382	0.572526	0.163575	3.50006	0.000465157	0.0299747	ACSF2
ENSG00000130856	1088.18	-0.689968	0.200858	-3.47955	0.000502249	0.032236	ZNF236
ENSG00000166592	83.4951	-0.677481	0.198558	-3.47241	0.000515806	0.0329748	RRAD
ENSG00000115457	140.152	-0.691792	0.200586	-3.46957	0.000521296	0.033194	IGFBP2
ENSG00000092068	159.404	-0.662749	0.19116	-3.46803	0.000524293	0.0332534	SLC7A8
ENSG00000173926	395.036	-0.521969	0.150615	-3.46453	0.000531156	0.0334255	MARCH3
ENSG00000112378	5159.33	0.380692	0.1101	3.45767	0.000544864	0.0341547	PERP
ENSG00000186470	1124.62	0.509698	0.147458	3.45643	0.000547376	0.0341792	BTN3A2
ENSG00000169894	17.8324	-0.542218	0.168959	-3.45193	0.0005566	0.0346209	MUC3A
ENSG00000137273	670.046	0.471192	0.136535	3.4507	0.00055913	0.0346445	FOXF2
ENSG00000110721	799.895	-0.497675	0.144409	-3.44599	0.000568971	0.0351192	CHKA
ENSG00000174197	966.96	-0.473481	0.137497	-3.44318	0.00057492	0.035351	MGA
ENSG00000151117	91.535	-0.686898	0.200522	-3.43715	0.000587871	0.0360099	TMEM86A
ENSG00000185201	2042.22	0.397604	0.115729	3.43555	0.000591343	0.0360854	IFITM2
ENSG00000130164	6511.32	-0.641602	0.187069	-3.43348	0.000595877	0.0362248	LDLR
ENSG00000185737	218.173	-0.678146	0.198378	-3.42902	0.000605775	0.0366881	NRG3
ENSG00000169710	18560.9	-0.585418	0.171486	-3.41486	0.000638148	0.0383603	FASN
ENSG00000049192	774.176	-0.663257	0.194826	-3.41122	0.000646731	0.0387318	ADAMTS6
ENSG00000147383	1210.62	-0.537637	0.158318	-3.3963	0.000683042	0.0406044	NSDHL
ENSG00000138061	541.522	0.538733	0.158663	3.39511	0.00068602	0.0406316	CYP1B1
ENSG00000182568	1186.55	0.501215	0.147688	3.39373	0.000689468	0.0406862	SATB1
ENSG00000154240	379.691	0.565604	0.166863	3.38897	0.000701548	0.0412479	CEP112
ENSG00000179178	37.1878	-0.406227	0.146267	-3.38539	0.000710778	0.0416387	TMEM125
ENSG00000125740	195.319	-0.60905	0.189015	-3.36557	0.000763844	0.0441398	FOSB
ENSG00000280852	17.5814	0.180311	0.0957022	3.36536	0.000764432	0.0441398	AC025048.6
ENSG00000173157	16.2244	-0.540287	0.171365	-3.36241	0.000772651	0.044455	ADAMTS20
ENSG00000116761	431.098	-0.662549	0.197692	-3.36131	0.000775747	0.0444743	CTH
ENSG00000184792	508.274	-0.659972	0.196944	-3.35961	0.000780532	0.04459	OSBP2
ENSG00000118997	50.7339	0.557592	0.177833	3.35852	0.000783624	0.0446084	DNAH7
ENSG00000115107	5059.57	0.466491	0.139236	3.35042	0.000806891	0.0457712	STEAP3
ENSG00000154764	6.06792	-0.224349	0.10455	-3.3492	0.000810464	0.0458126	WNT7A
ENSG00000180611	1049.99	-0.387015	0.115806	-3.34174	0.00083256	0.0467336	MB21D2
ENSG00000105419	253.032	-0.599813	0.179617	-3.33847	0.000842398	0.0469586	MEIS3
ENSG00000119669	2425.89	0.37221	0.111525	3.33743	0.000845565	0.0469726	IRF2BPL
ENSG00000117115	121.207	-0.586085	0.185409	-3.32581	0.000881634	0.0486409	PADI2
ENSG00000144893	55.6802	-0.43748	0.153962	-3.32476	0.000884945	0.0486569	MED12L
ENSG00000076356	618.213	-0.628413	0.189292	-3.32243	0.000892358	0.0487318	PLXNA2
ENSG00000122641	240.678	-0.579798	0.174442	-3.32244	0.00089234	0.0487318	INHBA
ENSG00000048740	3735.5	-0.472787	0.142551	-3.31666	0.00091099	0.0495812	CELF2
